# Supplementary material
Source: PubMed Central journal article supplement (PMC10273352)
Supplement: PRO-32-e4690-s001.pdf [file PRO-32-e4690-s001.pdf]

## Supporting Information for

### ***High-Throughput Computational Investigation of Protein Electrostatics and Cavity for SAM-Dependent Methyltransferases***

Christopher Jurich,<sup>1</sup> and Zhongyue J. Yang<sup>1-5,\*</sup>

<sup>1</sup>*Department of Chemistry, Vanderbilt University, Nashville, Tennessee 37235, United States*

<sup>2</sup>*Center for Structural Biology, Vanderbilt University, Nashville, Tennessee 37235, United States*

<sup>3</sup>*Vanderbilt Institute of Chemical Biology, Vanderbilt University, Nashville, Tennessee 37235,*

*United States* <sup>4</sup>*Data Science Institute, Vanderbilt University, Nashville, Tennessee, 37235, United*

*States* <sup>5</sup>*Department of Chemical and Biomolecular Engineering, Vanderbilt University, Nashville,*

*Tennessee 37235, United States*

#### **Contents**

|                                                                                 |          |
|---------------------------------------------------------------------------------|----------|
| <b>Table S1</b> Activation barriers for various EC 2.1.1.X enzymes              | Page S2  |
| <b>Table S2</b> List of PDB ids                                                 | Page S2  |
| <b>Figure S1</b> PDB query used                                                 | Page S3  |
| <b>Table S3</b> Enzyme quaternary state                                         | Page S4  |
| <b>Text S1</b> Sequence clustering                                              | Page S4  |
| <b>Table S4</b> Enzymatic function data annotations                             | Page S4  |
| <b>Figure S2</b> AMBER MD minimization settings                                 | Page S7  |
| <b>Table S5</b> Dipole moments and $\Delta G_{elec}$ values                     | Page S7  |
| <b>Table S6</b> B-Factors by enzyme location                                    | Page S8  |
| <b>Figure S3</b> EF strength contribution stratified by residue characteristics | Page S11 |
| <b>Figure S4</b> N-targeting MTases stratified by substrate and hybridization   | Page S12 |

**Table S1.** Activation free energy barriers for various EC 2.1.1.X enzymes. The values were converted from turnover numbers extracted from IntEnzyDB.

| EC Number | Activation Free Energy (kcal/mol) |
|-----------|-----------------------------------|
| 2.1.1.1   | 14.9                              |
| 2.1.1.103 | 11.3                              |
| 2.1.1.104 | 13.8                              |
| 2.1.1.141 | 15.8                              |
| 2.1.1.15  | 13.5                              |
| 2.1.1.164 | 12.6                              |
| 2.1.1.184 | 10.5                              |
| 2.1.1.2   | 12.3                              |
| 2.1.1.228 | 12.6                              |
| 2.1.1.235 | 13.1                              |
| 2.1.1.293 | 8.8                               |
| 2.1.1.303 | 15.1                              |
| 2.1.1.41  | 14.0                              |
| 2.1.1.53  | 12.1                              |
| 2.1.1.72  | 10.2                              |

**Table S2.** List of PDB ids

The below table contains all of the 175 PDB codes gathered by the query. The used column indicates if they were included in the final dataset of 91.

| pdb  | used  | pdb  | used  | pdb  | used  | pdb  | used  |
|------|-------|------|-------|------|-------|------|-------|
| 1eiz | TRUE  | 3elu | TRUE  | 5e9q | FALSE | 5zzd | FALSE |
| 1ej0 | FALSE | 3elw | FALSE | 5ec8 | FALSE | 6a5k | TRUE  |
| 1fpq | TRUE  | 3fzg | TRUE  | 5ehi | FALSE | 6bm5 | FALSE |
| 1g60 | TRUE  | 3g88 | TRUE  | 5eif | FALSE | 6h2u | TRUE  |
| 1i9g | TRUE  | 3g89 | FALSE | 5eiw | FALSE | 6i3c | FALSE |
| 1jg4 | TRUE  | 3gcz | FALSE | 5ekx | FALSE | 6ift | TRUE  |
| 1msk | FALSE | 3lcv | TRUE  | 5fhq | FALSE | 6inw | FALSE |
| 1n2x | TRUE  | 3m6v | TRUE  | 5fhr | TRUE  | 6ix5 | FALSE |
| 1n6a | TRUE  | 3m6w | TRUE  | 5h5f | TRUE  | 6ix8 | TRUE  |
| 1rjd | TRUE  | 3mb5 | TRUE  | 5il1 | TRUE  | 6ix9 | FALSE |
| 1sqf | TRUE  | 3mte | TRUE  | 5jhn | FALSE | 6j1o | FALSE |
| 1v2x | TRUE  | 3o7w | TRUE  | 5jin | FALSE | 6kmr | TRUE  |
| 1vid | FALSE | 3ooi | TRUE  | 5jly | FALSE | 6kqq | FALSE |
| 1vpt | TRUE  | 3p97 | FALSE | 5jj0 | FALSE | 6lfe | FALSE |
| 1wg8 | TRUE  | 3pfg | TRUE  | 5k7u | TRUE  | 6nw6 | TRUE  |

|      |       |      |       |      |       |      |       |
|------|-------|------|-------|------|-------|------|-------|
| 1zq9 | TRUE  | 3qwp | FALSE | 5kjk | FALSE | 6p3n | TRUE  |
| 2avd | TRUE  | 3r24 | FALSE | 5kqr | FALSE | 6p6k | FALSE |
| 2b9e | TRUE  | 3rq4 | TRUE  | 5kqs | FALSE | 6p7z | TRUE  |
| 2cl5 | FALSE | 3s68 | FALSE | 5l6e | TRUE  | 6paf | FALSE |
| 2dpm | FALSE | 3s8p | TRUE  | 5lsa | FALSE | 6w4h | FALSE |
| 2egv | TRUE  | 3tg4 | TRUE  | 5nfj | TRUE  | 6w61 | FALSE |
| 2fk8 | TRUE  | 3tm4 | TRUE  | 5njv | FALSE | 6w75 | FALSE |
| 2g72 | TRUE  | 4blv | TRUE  | 5t0k | TRUE  | 6wvn | FALSE |
| 2nxe | TRUE  | 4ctj | FALSE | 5t0m | FALSE | 6wzw | TRUE  |
| 2nyu | TRUE  | 4df3 | TRUE  | 5teg | TRUE  | 6x0p | FALSE |
| 2plw | TRUE  | 4e47 | FALSE | 5ttf | TRUE  | 6yuh | FALSE |
| 2qmm | TRUE  | 4fak | TRUE  | 5ttg | TRUE  | 6zrb | FALSE |
| 2r3a | TRUE  | 4fzv | TRUE  | 5tuz | FALSE | 7bj1 | FALSE |
| 2uyq | TRUE  | 4htf | TRUE  | 5ubb | TRUE  | 7btv | FALSE |
| 2v3k | TRUE  | 4ij8 | TRUE  | 5upd | TRUE  | 7dcf | FALSE |
| 2yqz | FALSE | 4iv8 | FALSE | 5v37 | FALSE | 7edc | TRUE  |
| 3ai9 | TRUE  | 4j83 | FALSE | 5v9i | FALSE | 7lzd | TRUE  |
| 3aia | TRUE  | 4jlg | FALSE | 5v9j | TRUE  | 7m6b | TRUE  |
| 3bwm | FALSE | 4lg1 | TRUE  | 5vsc | TRUE  | 7o2a | FALSE |
| 3bwy | TRUE  | 4n49 | TRUE  | 5vsd | FALSE | 7o2c | FALSE |
| 3bxo | TRUE  | 4qdj | TRUE  | 5vse | TRUE  | 7o4n | TRUE  |
| 3ckk | TRUE  | 4xuc | FALSE | 5vsf | TRUE  | 7phd | TRUE  |
| 3dmf | TRUE  | 4yvg | TRUE  | 5wy0 | TRUE  | 7r7o | TRUE  |
| 3dmh | FALSE | 5arf | FALSE | 5x7f | FALSE | 7se7 | TRUE  |
| 3dou | TRUE  | 5arg | FALSE | 5xxd | FALSE | 7t7l | FALSE |
| 3dxy | TRUE  | 5ccl | FALSE | 5xxj | FALSE | 7tw7 | FALSE |

Query: ( Data Collection Resolution <= 2 **AND**  
 Enzyme Classification Number = 2.1.1 **AND**  
 Polymer Entity Type **NOT** = "DNA" **AND**  
 Polymer Entity Type **NOT** = "RNA" **AND**  
 Polymer Entity Type **NOT** = "NA-hybrid" )  
**AND** Chemical ID(s) = SAM

**Figure S1:** PDB query used

The above query was used on 2022-10-03 to collect the initial list of 175 PDB ids.

**Table S3.** Enzyme quaternary state of the dataset. Biological assemblies from the PDB were used.

| Number of Units | Percentage | PDB IDs                                                                                                                                                                                                                                                                                                                                                                      |
|-----------------|------------|------------------------------------------------------------------------------------------------------------------------------------------------------------------------------------------------------------------------------------------------------------------------------------------------------------------------------------------------------------------------------|
| 1               | 80.22%     | 1eiz,1fpq,1i9g,1jg4,1n2x,1n6a,1rjd,1sqf,1v2x,1vpt,1wg8,2b9e,2fk8,2g72,2nxe,2nyu,2plw,2r3a,2uyq,2v3k,3ai9,3bwy,3cck,3dmf,3dou,3dxy,3elu,3fzg,3g88,3lcv,3m6v,3m6w,3mb5,3mte,3o7w,3ooi,3pfg,3rq4,3s8p,3tg4,3tm4,4blv,4df3,4fak,4fzv,4n49,4qdj,4yvg,5h5f,5il1,5k7u,5l6e,5nfj,5t0k,5teg,5ttg,5ubb,5upd,5vse,5wy0,6a5k,6h2u,6ift,6kmr,6p3n,6p7z,6wzw,7edc,7lzd,7m6b,7o4n,7r7o,7se7 |
| 2               | 18.68%     | 1g60,1zq9,2avd,2egv,2qmm,3aia,3bxo,4htf,4ij8,5fhr,5ttf,5v9j,5vsc,5vsf,6ix8,6nw6,7phd                                                                                                                                                                                                                                                                                         |
| 3               | 1.10%      | 4lg1                                                                                                                                                                                                                                                                                                                                                                         |

**Text S1:** Sequence clustering

Sequences were taken from the FASTA files associated with each structure and clustered through using a 95% similarity cutoff and 5% distance cutoff. For each sequence, it would be compared to all the sequences in existing clusters and would be included if it was the edit distance between the sequences and the length difference between the two is less than 5% the average length of the sequence being compared to and the candidate sequence. In this version of edit distance, all edits are given a weighting of 1.

**Table S4:** Enzymatic function data annotations

Below are the annotations and reaction classifications for all entries included in the final analysis. Reaction categories were derived from EC numbers when available or publication data when not.

| pdb  | EC        | protein reaction | RNA/DNA reaction | histone reaction | small molecule reaction | SAM reaction |
|------|-----------|------------------|------------------|------------------|-------------------------|--------------|
| 1eiz | 2.1.1.166 | 0                | 1                | 0                | 0                       | 1            |
| 1fpq | 2.1.1.154 | 0                | 0                | 0                | 1                       | 1            |
| 1g60 | 2.1.1.72  | 0                | 1                | 0                | 0                       | 1            |
| 1i9g | 2.1.1.220 | 0                | 1                | 0                | 0                       | 1            |
| 1jg4 | 2.1.1.77  | 1                | 0                | 0                | 0                       | 1            |
| 1n2x | 2.1.1.199 | 0                | 1                | 0                | 0                       | 1            |
| 1n6a | 2.1.1.364 | 0                | 0                | 1                | 0                       | 1            |
| 1rjd | 2.1.1.233 | 1                | 0                | 0                | 0                       | 1            |
| 1sqf | 2.1.1.176 | 0                | 1                | 0                | 0                       | 1            |
| 1v2x | 2.1.1.34  | 0                | 1                | 0                | 0                       | 1            |

|      |           |   |   |   |   |   |
|------|-----------|---|---|---|---|---|
| 1vpt | 2.1.1.57  | 0 | 1 | 0 | 0 | 1 |
| 1wg8 | 2.1.1.199 | 0 | 1 | 0 | 0 | 1 |
| 1zq9 | 2.1.1.183 | 0 | 1 | 0 | 0 | 1 |
| 2avd | 2.1.1.6   | 0 | 0 | 0 | 1 | 1 |
| 2b9e | 2.1.1.-   | 0 | 1 | 0 | 0 | 1 |
| 2egv | 2.1.1.193 | 0 | 1 | 0 | 0 | 1 |
| 2fk8 | 2.1.1.-   | 0 | 0 | 0 | 1 | 1 |
| 2g72 | 2.1.1.28  | 0 | 0 | 0 | 1 | 1 |
| 2nxe | 2.1.1.244 | 1 | 0 | 0 | 0 | 1 |
| 2nyu | 2.1.1.-   | 0 | 1 | 0 | 0 | 1 |
| 2plw | 2.1.1.56  | 0 | 1 | 0 | 0 | 1 |
| 2qmm | 2.1.1.257 | 0 | 1 | 0 | 0 | 1 |
| 2r3a | 2.1.1.355 | 0 | 0 | 1 | 0 | 1 |
| 2uyq | 2.1.1.-   | 0 | 0 | 0 | 0 | 1 |
| 2v3k | 2.1.1.260 | 0 | 1 | 0 | 0 | 1 |
| 3ai9 | 2.1.1.257 | 0 | 1 | 0 | 0 | 1 |
| 3aia | 2.1.1.257 | 0 | 1 | 0 | 0 | 1 |
| 3bwy | 2.1.1.6   | 0 | 0 | 0 | 1 | 1 |
| 3bxo | 2.1.1.234 | 0 | 0 | 0 | 1 | 1 |
| 3ckk | 2.1.1.33  | 0 | 1 | 0 | 0 | 1 |
| 3dmf |           | 0 | 1 | 0 | 0 | 1 |
| 3dou | 2.1.1.166 | 0 | 1 | 0 | 0 | 1 |
| 3dxy | 2.1.1.33  | 0 | 1 | 0 | 0 | 1 |
| 3elu | 2.1.1.57  | 0 | 0 | 0 | 0 | 1 |
| 3fzg | 2.1.1.179 | 0 | 1 | 0 | 0 | 1 |
| 3g88 | 2.1.1.170 | 0 | 1 | 0 | 0 | 1 |
| 3lcv | 2.1.1.179 | 0 | 1 | 0 | 0 | 1 |
| 3m6v | 2.1.1.-   | 0 | 1 | 0 | 0 | 1 |
| 3m6w | 2.1.1.-   | 0 | 1 | 0 | 0 | 1 |
| 3mb5 | 2.1.1.219 | 0 | 1 | 0 | 0 | 1 |
| 3mte | 2.1.1.180 | 0 | 1 | 0 | 0 | 1 |
| 3o7w | 2.1.1.-   | 0 | 1 | 0 | 0 | 1 |
| 3ooi | 2.1.1.357 | 0 | 0 | 1 | 0 | 1 |
| 3pfg | 2.1.1.235 | 0 | 0 | 0 | 1 | 1 |
| 3rq4 | 2.1.1.362 | 0 | 0 | 1 | 0 | 1 |
| 3s8p | 2.1.1.362 | 0 | 0 | 1 | 0 | 1 |
| 3tg4 | 2.1.1.354 | 0 | 0 | 1 | 0 | 1 |
| 3tm4 | 2.1.1.256 | 0 | 1 | 0 | 0 | 1 |
| 4blv | 2.1.1.266 | 0 | 1 | 0 | 0 | 1 |
| 4df3 | 2.1.1.-   | 0 | 1 | 0 | 0 | 1 |
| 4fak | 2.1.1.177 | 0 | 1 | 0 | 0 | 1 |
| 4fzv | 2.1.1.-   | 0 | 1 | 0 | 0 | 1 |
| 4htf | 2.1.1.-   | 0 | 1 | 0 | 0 | 1 |

|      |           |   |   |   |   |   |
|------|-----------|---|---|---|---|---|
| 4ij8 | 2.1.1.-   | 0 | 0 | 1 | 0 | 1 |
| 4lg1 | 2.1.1.-   | 1 | 0 | 0 | 0 | 1 |
| 4n49 | 2.1.1.57  | 0 | 1 | 0 | 0 | 1 |
| 4qdj | 2.1.1.11  | 0 | 0 | 0 | 1 | 1 |
| 4yvg | 2.1.1.228 | 0 | 1 | 0 | 0 | 1 |
| 5fhr | 2.1.1.6   | 0 | 0 | 0 | 1 | 1 |
| 5h5f | 2.1.1.-   | 0 | 0 | 0 | 0 | 1 |
| 5il1 | 2.1.1.348 | 0 | 1 | 0 | 0 | 1 |
| 5k7u |           | 0 | 1 | 0 | 0 | 1 |
| 5l6e | 2.1.1.348 | 0 | 1 | 0 | 0 | 1 |
| 5nfj | 2.1.1.218 | 0 | 1 | 0 | 0 | 1 |
| 5t0k | 2.1.1.367 | 0 | 0 | 1 | 0 | 1 |
| 5teg | 2.1.1.367 | 0 | 0 | 1 | 0 | 1 |
| 5ttf | 2.1.1.367 | 0 | 0 | 1 | 0 | 1 |
| 5ttg | 2.1.1.367 | 0 | 0 | 1 | 0 | 1 |
| 5ubb | 2.1.1.299 | 1 | 0 | 0 | 0 | 1 |
| 5upd | 2.1.1.370 | 0 | 0 | 1 | 0 | 1 |
| 5v9j | 2.1.1.367 | 0 | 0 | 1 | 0 | 1 |
| 5vsc | 2.1.1.367 | 0 | 0 | 1 | 0 | 1 |
| 5vse | 2.1.1.367 | 0 | 0 | 1 | 0 | 1 |
| 5vsf | 2.1.1.367 | 0 | 0 | 1 | 0 | 1 |
| 5wy0 | 2.1.1.n8  | 0 | 1 | 0 | 0 | 1 |
| 6a5k | 2.1.1.43  | 0 | 0 | 1 | 0 | 1 |
| 6h2u | 2.1.1.-   | 0 | 1 | 0 | 0 | 1 |
| 6ift | 2.1.1.182 | 0 | 1 | 0 | 0 | 1 |
| 6ix8 | 2.1.1.-   | 0 | 0 | 0 | 0 | 1 |
| 6kmr | 2.1.1.72  | 0 | 0 | 1 | 0 | 1 |
| 6nw6 | 2.1.1.228 | 0 | 1 | 0 | 0 | 1 |
| 6p3n | 2.1.1.122 | 0 | 0 | 0 | 0 | 1 |
| 6p7z | 2.1.1.354 | 0 | 0 | 1 | 0 | 1 |
| 6wzw | 2.1.1.359 | 0 | 0 | 1 | 0 | 1 |
| 7edc | 2.1.1.34  | 0 | 1 | 0 | 0 | 1 |
| 7lzd | 2.1.1.359 | 0 | 0 | 1 | 0 | 1 |
| 7m6b | 2.1.1.72  | 0 | 1 | 0 | 0 | 1 |
| 7o4n | 2.1.1.217 | 0 | 1 | 0 | 0 | 1 |
| 7phd |           |   |   |   |   |   |
| 7r7o |           |   |   |   |   |   |
| 7se7 |           | 0 | 0 | 1 | 0 | 1 |

The below content was used in the min.in file supplied to Amber19's sander application:

```
Minimize
&cntrl
imin=1,
ntx=1,
irest=0,
maxcyc=20000,
ncyc=10000,
ntpr=4000,
ntwx=0,
cut=8.0,
/
```

**Figure S2:** AMBER MD minimization settings

**Table S5.** Dipole Moments and  $\Delta G_{elec}$  Values. In the case that multiple active sites exist, they are denoted as <code>.<n>.

| Active Site | Dipole Moment Magnitude (Debye) | $\Delta G_{elec}$ (kcal/mol) |
|-------------|---------------------------------|------------------------------|
| 1eiz        | 0.764                           | 19.619                       |
| 1g60.1      | 0.802                           | -0.656                       |
| 1g60.2      | 0.840                           | 4.422                        |
| 1i9g        | 0.784                           | 6.079                        |
| 1jg4        | 0.772                           | -0.180                       |
| 1n2x        | 0.748                           | 12.611                       |
| 1n6a        | 0.831                           | 4.889                        |
| 1sqf        | 0.719                           | 2.756                        |
| 2avd.1      | 0.833                           | 8.320                        |
| 2avd.2      | 0.820                           | 1.658                        |
| 2r3a        | 0.854                           | 5.160                        |
| 3ooi        | 0.744                           | -8.742                       |

**Table S6.** B-Factors By Enzyme Location. Raw B values were taken from each respective PDB entry.  $B_{norm}$  was calculated using Eq 1. Active site is defined as all atoms within 3 Å of the SAM ligand.

| Active Site Location | SAM Ligand       |                     | Active Site      |                     | Rest of Enzyme   |                     |
|----------------------|------------------|---------------------|------------------|---------------------|------------------|---------------------|
|                      | $\bar{B}_{norm}$ | $\sigma_{B_{norm}}$ | $\bar{B}_{norm}$ | $\sigma_{B_{norm}}$ | $\bar{B}_{norm}$ | $\sigma_{B_{norm}}$ |
| 1eiz.A.301.SAM       | -0.408           | 0.277               | -0.400           | 0.665               | 0.088            | 1.043               |
| 1fpq.A.1699.SAM      | 0.800            | 0.819               | -0.601           | 0.377               | 0.038            | 1.017               |
| 1g60.A.500.SAM       | 0.425            | 0.355               | -0.063           | 0.626               | -0.025           | 1.028               |
| 1g60.B.501.SAM       | 0.695            | 0.163               | 0.265            | 0.929               | -0.025           | 1.028               |
| 1i9g.A.301.SAM       | -0.441           | 0.109               | -0.243           | 0.466               | 0.039            | 1.053               |
| 1jg4.A.500.SAM       | -0.100           | 0.380               | -0.451           | 0.644               | 0.080            | 1.037               |
| 1n2x.A.401.SAM       | -0.405           | 0.228               | -0.164           | 0.923               | 0.029            | 1.014               |
| 1n6a.A.402.SAM       | -0.167           | 0.276               | -0.159           | 0.792               | 0.024            | 1.030               |
| 1rjd.A.801.SAM       | -0.760           | 0.160               | -0.427           | 0.792               | 0.059            | 1.012               |
| 1sqf.A.430.SAM       | 1.746            | 0.545               | -0.431           | 0.826               | 0.011            | 0.994               |
| 1v2x.A.400.SAM       | 0.366            | 0.901               | -0.370           | 0.518               | 0.049            | 1.044               |
| 1vpt.A.400.SAM       | -0.722           | 0.317               | -0.571           | 0.826               | 0.068            | 1.000               |
| 1wg8.A.3142.SAM      | -0.564           | 0.266               | -0.371           | 0.707               | 0.059            | 1.027               |
| 1zq9.A.4000.SAM      | 3.124            | 1.778               | 0.152            | 1.041               | -0.058           | 0.929               |
| 1zq9.B.4001.SAM      | 1.722            | 1.964               | 0.294            | 1.015               | -0.058           | 0.929               |
| 2avd.A.501.SAM       | -0.467           | 0.197               | -0.488           | 0.568               | 0.047            | 1.050               |
| 2avd.B.601.SAM       | -0.050           | 0.166               | -0.012           | 0.570               | 0.047            | 1.050               |
| 2b9e.A.1201.SAM      | -0.117           | 0.155               | -0.128           | 0.671               | 0.016            | 1.036               |
| 2egv.A.1300.SAM      | -0.133           | 0.865               | -0.480           | 0.547               | 0.059            | 1.027               |
| 2egv.B.1400.SAM      | -0.231           | 0.873               | -0.380           | 0.695               | 0.059            | 1.027               |
| 2fk8.A.302.SAM       | -0.130           | 0.377               | -0.117           | 0.752               | 0.015            | 1.029               |
| 2g72.A.2001.SAM      | 0.241            | 0.600               | -0.365           | 0.844               | 0.049            | 1.014               |
| 2nxe.A.302.SAM       | -0.513           | 0.556               | -0.742           | 0.478               | 0.112            | 1.012               |
| 2nyu.A.201.SAM       | -0.634           | 0.203               | -0.439           | 0.658               | 0.095            | 1.035               |
| 2plw.A.203.SAM       | -0.066           | 0.471               | -0.314           | 0.750               | 0.058            | 1.037               |
| 2qmm.A.301.SAM       | 1.448            | 0.179               | 0.275            | 1.026               | -0.032           | 1.012               |
| 2qmm.B.301.SAM       | 0.691            | 0.147               | -0.036           | 0.658               | -0.032           | 1.012               |
| 2r3a.A.304.SAM       | -0.499           | 0.351               | -0.437           | 0.704               | 0.057            | 1.020               |
| 2uyq.A.1311.SAM      | 1.150            | 0.276               | -0.179           | 0.458               | 0.004            | 1.029               |
| 2v3k.A.1254.SAM      | -0.467           | 0.668               | -0.532           | 0.756               | 0.086            | 1.010               |
| 3ai9.X.501.SAM       | 2.323            | 0.401               | 0.329            | 0.969               | -0.078           | 0.962               |
| 3aia.A.206.SAM       | 0.304            | 0.105               | -0.078           | 0.708               | -0.085           | 0.967               |
| 3aia.B.206.SAM       | 2.032            | 0.189               | 1.069            | 1.008               | -0.085           | 0.967               |
| 3bwy.A.301.SAM       | -0.491           | 0.253               | -0.527           | 0.374               | 0.106            | 1.053               |
| 3bxo.A.238.SAM       | 0.201            | 0.951               | -0.029           | 0.794               | 0.021            | 1.036               |
| 3bxo.B.238.SAM       | -0.153           | 0.335               | -0.272           | 0.594               | 0.021            | 1.036               |
| 3ckk.A.301.SAM       | -0.322           | 0.181               | -0.124           | 1.016               | 0.026            | 1.005               |



|                 |        |       |        |       |       |       |
|-----------------|--------|-------|--------|-------|-------|-------|
| 3dmf.A.388.SAM  | -1.364 | 0.549 | -0.388 | 0.566 | 0.052 | 1.018 |
| 3dou.A.1.SAM    | -0.331 | 0.378 | -0.364 | 0.475 | 0.067 | 1.057 |
| 3dxy.A.1.SAM    | -0.076 | 0.179 | -0.553 | 0.918 | 0.074 | 0.996 |
| 3elu.A.4633.SAM | -0.337 | 0.479 | -0.217 | 0.709 | 0.029 | 1.029 |
| 3fzg.A.300.SAM  | -0.671 | 0.233 | -0.656 | 0.434 | 0.118 | 1.028 |
| 3g88.A.303.SAM  | -0.516 | 0.284 | -0.486 | 0.639 | 0.057 | 1.021 |
| 3lcv.B.301.SAM  | -0.631 | 0.350 | -0.628 | 0.530 | 0.115 | 1.024 |
| 3m6v.A.465.SAM  | 0.069  | 0.287 | -0.405 | 0.354 | 0.025 | 1.025 |
| 3m6w.A.465.SAM  | 0.170  | 0.351 | -0.350 | 0.422 | 0.021 | 1.025 |
| 3mb5.A.301.SAM  | -0.582 | 0.184 | -0.263 | 0.670 | 0.041 | 1.033 |
| 3mte.A.220.SAM  | -0.441 | 0.337 | -0.745 | 0.365 | 0.121 | 1.022 |
| 3o7w.A.801.SAM  | -0.344 | 0.207 | -0.512 | 0.384 | 0.057 | 1.033 |
| 3ooi.A.237.SAM  | -0.691 | 0.260 | -0.565 | 0.582 | 0.095 | 1.024 |
| 3pfg.A.264.SAM  | -0.752 | 0.127 | -0.490 | 0.450 | 0.109 | 1.051 |
| 3rq4.A.500.SAM  | -0.826 | 0.271 | -0.669 | 0.514 | 0.109 | 1.017 |
| 3s8p.A.500.SAM  | -0.866 | 0.192 | -0.675 | 0.483 | 0.128 | 1.020 |
| 3tg4.A.434.SAM  | -0.506 | 0.114 | -0.179 | 0.505 | 0.018 | 1.030 |
| 3tm4.A.401.SAM  | -0.685 | 0.197 | -0.550 | 0.603 | 0.054 | 1.015 |
| 4blv.A.1281.SAM | -0.164 | 0.204 | -0.433 | 0.351 | 0.068 | 1.055 |
| 4df3.A.301.SAM  | -0.175 | 0.179 | -0.306 | 0.757 | 0.044 | 1.029 |
| 4fak.A.201.SAM  | -0.159 | 0.627 | -0.373 | 0.989 | 0.064 | 0.995 |
| 4fzv.A.401.SAM  | -0.652 | 0.216 | -0.672 | 0.399 | 0.072 | 1.019 |
| 4htf.A.301.SAM  | -0.229 | 0.169 | -0.247 | 0.560 | 0.006 | 1.040 |
| 4htf.B.301.SAM  | -0.028 | 0.146 | 0.191  | 0.737 | 0.006 | 1.040 |
| 4ij8.A.501.SAM  | -0.953 | 0.305 | -0.830 | 0.289 | 0.219 | 1.002 |
| 4ij8.B.501.SAM  | -0.932 | 0.330 | -0.857 | 0.308 | 0.219 | 1.002 |
| 4lg1.A.301.SAM  | -0.177 | 0.153 | -0.392 | 0.697 | 0.058 | 1.026 |
| 4lg1.B.301.SAM  | -0.658 | 0.172 | -0.755 | 0.440 | 0.058 | 1.026 |
| 4lg1.C.301.SAM  | 0.230  | 0.109 | 0.245  | 0.935 | 0.058 | 1.026 |
| 4n49.A.601.SAM  | -0.422 | 0.247 | -0.455 | 0.417 | 0.035 | 1.024 |
| 4qdj.A.301.SAM  | -0.134 | 0.603 | -0.335 | 0.627 | 0.067 | 1.050 |
| 4yvg.A.301.SAM  | -0.140 | 0.964 | -0.618 | 0.492 | 0.076 | 1.020 |
| 5fhr.A.303.SAM  | -0.571 | 0.245 | -0.513 | 0.492 | 0.118 | 1.045 |
| 5fhr.B.303.SAM  | -0.619 | 0.301 | -0.542 | 0.520 | 0.118 | 1.045 |
| 5h5f.A.301.SAM  | -0.878 | 0.378 | -0.368 | 0.899 | 0.101 | 1.002 |
| 5il1.A.601.SAM  | -0.485 | 0.277 | -0.129 | 0.866 | 0.031 | 1.025 |
| 5k7u.A.601.SAM  | -0.335 | 0.212 | -0.246 | 0.674 | 0.047 | 1.046 |
| 5l6e.A.601.SAM  | -0.117 | 0.574 | -0.296 | 0.629 | 0.058 | 1.052 |
| 5nfj.A.501.SAM  | -0.463 | 0.348 | -0.398 | 0.485 | 0.091 | 1.063 |
| 5t0k.A.1304.SAM | -0.503 | 0.263 | -0.331 | 0.655 | 0.053 | 1.035 |
| 5teg.A.401.SAM  | -0.446 | 0.232 | -0.621 | 0.257 | 0.122 | 1.050 |

|                 |        |       |        |       |        |       |
|-----------------|--------|-------|--------|-------|--------|-------|
| 5ttf.A.1505.SAM | -0.334 | 0.249 | -0.295 | 0.662 | 0.046  | 1.033 |
| 5ttf.B.1505.SAM | -0.304 | 0.220 | -0.361 | 0.678 | 0.046  | 1.033 |
| 5ttg.A.1301.SAM | 0.162  | 0.244 | 0.023  | 0.818 | -0.005 | 1.026 |
| 5ubb.A.301.SAM  | -0.331 | 0.352 | -0.522 | 0.477 | 0.097  | 1.045 |
| 5upd.A.1301.SAM | -0.709 | 0.222 | -0.534 | 0.678 | 0.102  | 1.020 |
| 5v9j.A.1301.SAM | 0.127  | 0.203 | 0.128  | 0.832 | 0.000  | 1.024 |
| 5v9j.B.1301.SAM | -0.246 | 0.136 | -0.110 | 0.833 | 0.000  | 1.024 |
| 5vsc.A.1505.SAM | -0.543 | 0.150 | -0.208 | 0.493 | 0.052  | 1.039 |
| 5vsc.B.1505.SAM | -0.714 | 0.144 | -0.524 | 0.438 | 0.052  | 1.039 |
| 5vse.A.1505.SAM | -0.685 | 0.149 | -0.408 | 0.452 | 0.058  | 1.039 |
| 5vsf.A.3001.SAM | -0.261 | 0.254 | -0.118 | 0.750 | 0.017  | 1.032 |
| 5vsf.B.3001.SAM | -0.094 | 0.260 | -0.113 | 0.746 | 0.017  | 1.032 |
| 5wy0.A.800.SAM  | 0.108  | 0.467 | 0.044  | 0.671 | -0.009 | 1.049 |
| 6a5k.A.805.SAM  | -0.732 | 0.512 | -0.542 | 0.619 | 0.047  | 1.012 |
| 6h2u.A.301.SAM  | -0.552 | 0.279 | -0.411 | 0.529 | 0.083  | 1.050 |
| 6ift.A.301.SAM  | -0.745 | 0.196 | -0.520 | 0.492 | 0.083  | 1.033 |
| 6ix8.A.401.SAM  | 0.058  | 0.471 | -0.352 | 0.610 | 0.030  | 1.021 |
| 6ix8.B.401.SAM  | -0.418 | 0.447 | -0.397 | 0.608 | 0.030  | 1.021 |
| 6nw6.A.301.SAM  | 0.290  | 1.652 | -0.400 | 0.736 | 0.066  | 1.006 |
| 6nw6.B.301.SAM  | 0.354  | 1.878 | -0.444 | 0.640 | 0.066  | 1.006 |
| 6p3n.A.401.SAM  | -0.342 | 0.313 | -0.462 | 0.355 | 0.041  | 1.030 |
| 6p7z.A.506.SAM  | -0.923 | 0.253 | -0.397 | 1.003 | 0.042  | 0.992 |
| 6wzw.A.2302.SAM | -0.623 | 0.280 | -0.267 | 0.803 | 0.056  | 1.027 |
| 7edc.A.300.SAM  | 2.595  | 0.906 | -0.014 | 1.237 | -0.042 | 0.902 |
| 7lzd.A.1804.SAM | -0.846 | 0.107 | -0.661 | 0.352 | 0.111  | 1.028 |
| 7m6b.A.301.SAM  | -0.642 | 0.299 | -0.554 | 0.756 | 0.093  | 1.009 |
| 7o4n.A.301.SAM  | 0.626  | 0.764 | -0.218 | 0.750 | 0.014  | 1.022 |
| 7phd.A.405.SAM  | -0.771 | 0.663 | -0.340 | 1.078 | 0.041  | 0.960 |
| 7phd.B.404.SAM  | -0.705 | 0.654 | -0.147 | 1.374 | 0.041  | 0.960 |
| 7r7o.A.301.SAM  | -0.620 | 0.254 | -0.649 | 0.372 | 0.117  | 1.033 |
| 7se7.A.401.SAM  | -0.386 | 0.320 | -0.407 | 0.417 | 0.073  | 1.056 |

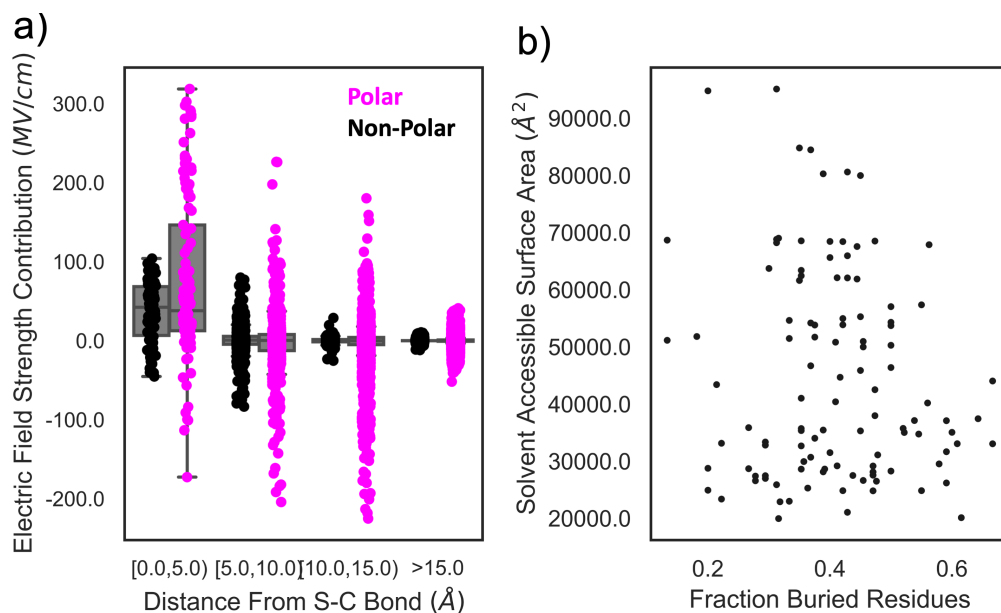

**Figure S3** EF strength contribution stratified by residue characteristics. The left (a) shows distributions of the EF strength contribution by residue in each of the 91 enzymes as a function of distance from the S—C bond in their respective enzyme. Boxplots are in grey for both polar and non-polar residues whereas stripplots are color coded by polarity with magenta and black representing polar and non-polar residues, respectively. The right shows the surface accessible surface area (SASA) of the active site and percent of buried residues in the active site, respectively. A residue was considered to be in the active site if it had an atom with 3 Å of SAM. A buried residue is defined as one which has less than 10% of its surface area exposed to solvent. All values were calculated using pymol.

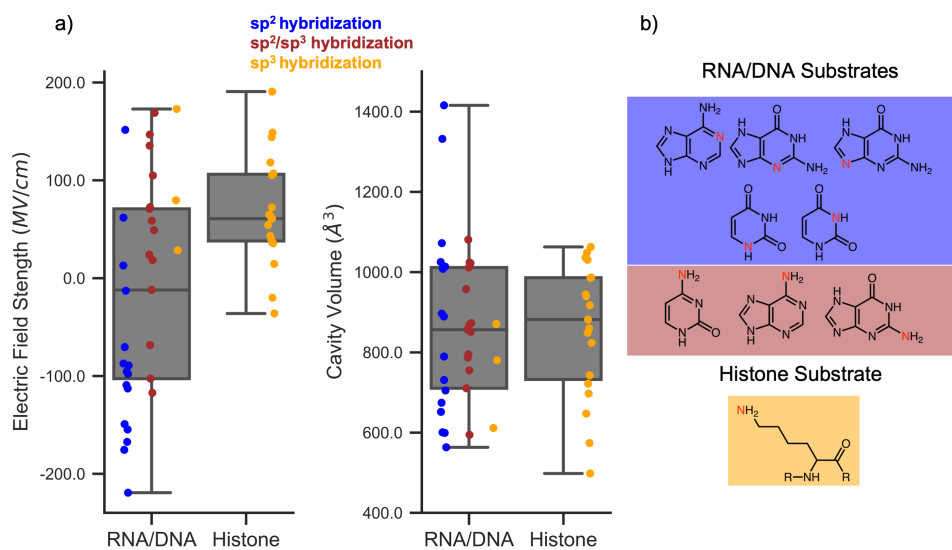

**Figure S4** *N*-targeting MTases stratified by substrate and hybridization. Below is a variation of Figure 4 from the main text where exocyclic  $-\text{NH}_2$  groups are placed into their own  $sp^2/sp^3$  group, colored in brown.
